# Supplementary material
Source: PubMed Central journal article supplement (PMC5967766)

## Supplementary Appendix

Supplement to:

Biomarkers of Acute Kidney Injury Progression after Pediatric Cardiac Surgery

| <b>Table of Contents</b>                                                                             | <b>Page</b> |
|------------------------------------------------------------------------------------------------------|-------------|
| Supplemental Table 1: Biomarker Level and Storage Time                                               | 2           |
| Supplemental Table 2: Biomarkers and AKI Progression                                                 | 3           |
| Supplemental Table 3: Performance of AKI Progression Biomarkers                                      | 4           |
| Supplemental Table 4: Biomarkers to Predict Progression from Stage I AKI to Higher AKI Stages        | 5           |
| Supplemental Table 5: Biomarkers to Predict Progression from Stage I and II AKI to Higher AKI Stages | 6           |
| Supplemental Figure 1a-1f: Biomarker Levels by Sample Storage Time                                   | 7           |
| Supplemental Figure 1g-l: Biomarker Levels by Sample Storage Time                                    | 8           |
| Supplemental Figure 1m-r: Biomarker Levels by Sample Storage Time                                    | 9           |

**Supplemental Table 1: Biomarker Level and Storage Time**

| <b>Biomarker Name</b> | <b>Percent change over one month (95% CI)</b> | <b>P-value</b> |
|-----------------------|-----------------------------------------------|----------------|
| Plasma IL1            | 0.35% (-0.44%, 1.16%)                         | 0.38           |
| Plasma IL2            | 0.72% (-1.67%, 3.17%)                         | 0.55           |
| Plasma IL4            | 0.64% (-1.37%, 2.69%)                         | 0.53           |
| Plasma IL6            | 1.96% (-0.82%, 4.8%)                          | 0.17           |
| Plasma IL8            | 0.04% (-2.08%, 2.21%)                         | 0.97           |
| Plasma IL10           | 1.79% (-1.5%, 5.19%)                          | 0.29           |
| Plasma IL12           | -1.5% (-2.67%, -0.31%)                        | 0.01           |
| Plasma IL13           | -0.08% (-1.5%, 1.36%)                         | 0.91           |
| Plasma IFN            | -1.07% (-3.07%, 0.97%)                        | 0.30           |
| Plasma TNF            | -0.8% (-1.79%, 0.2%)                          | 0.11           |
| Plasma NGAL           | 0.16% (-1.96%, 2.33%)                         | 0.88           |
| Plasma Cystatin       | 0.25% (-0.89%, 1.4%)                          | 0.67           |
| Urine L-FABP          | -1.45% (-4.86%, 2.09%)                        | 0.41           |
| Urine NGAL            | -0.04% (-7.73%, 8.28%)                        | 0.99           |
| Urine IL18            | -1.63% (-9.64%, 7.09%)                        | 0.70           |
| Urine KIM-1           | -0.25% (-2.31%, 1.86%)                        | 0.82           |
| Urine Albumin         | 0.23% (-1.92%, 2.43%)                         | 0.83           |
| Urine Cystatin        | 1.43% (0.06%, 2.81%)                          | 0.04           |

## Supplemental Table 2: Biomarkers and AKI Progression

| Biomarker                              | AKI Without Progression (N=148)* | AKI With Progression (N=28)‡ | P value |
|----------------------------------------|----------------------------------|------------------------------|---------|
| <b><u>Traditional Biomarkers</u></b>   |                                  |                              |         |
| Serum Cr Rise (%)                      | 67 (50, 100), N=148              | 80 (58, 133), N=28           | 0.05    |
| Urine Albuminuria (mg/g)               | 33.2 (13.7, 96.8), N=103         | 76.3 (32.1, 142.6), N=15     | 0.05    |
| <b><u>Cystatin C</u></b>               |                                  |                              |         |
| Urine Cystatin C (mg/L)                | 0.12 (0.07, 0.2), N=136          | 0.2 (0.07, 0.32), N=24       | 0.13    |
| Plasma Cystatin C (mg/L)               | 0.93 (0.71, 1.35), N=107         | 0.98 (0.86, 1.37), N=16      | 0.47    |
| <b><u>Kidney Injury Biomarkers</u></b> |                                  |                              |         |
| Urine IL-18 (pg/ml)                    | 40.67 (12.45, 131.05), N=106     | 79.2 (43.2, 492.9), N=17     | 0.01    |
| Urine NGAL (ng/ml)                     | 10.36 (4.95, 30.11), N=106       | 34.13 (12.49, 240.89), N=17  | 0.02    |
| Urine KIM-1 (ng/ml)                    | 0.63 (0.27, 2.28), N=138         | 0.95 (0.53, 2.3), N=26       | 0.27    |
| Urine L-FABP (ng/ml)                   | 32.05 (7.77, 151.53), N=138      | 257.29 (15.81, 591.98), N=26 | 0.001   |
| Plasma NGAL (ng/ml)                    | 129.59 (82.68, 217.31), N=98     | 177.56 (80.43, 192.26), N=15 | 0.94    |
| <b><u>Inflammatory Biomarkers</u></b>  |                                  |                              |         |
| Plasma IFN (pg/ml)                     | 2.07 (1.02, 3.69), N=71          | 1.98 (1.28, 3.96), N=20      | 0.79    |
| Plasma IL-1 (pg/ml)                    | 0.18 (0.18, 0.18), N=71          | 0.18 (0.18, 0.22), N=20      | 0.01    |
| Plasma IL-2 (pg/ml)                    | 0.25 (0.13, 0.48), N=71          | 0.54 (0.26, 1.05), N=20      | 0.02    |
| Plasma IL-4 (pg/ml)                    | 0.05 (0.03, 0.12), N=71          | 0.07 (0.05, 0.17), N=20      | 0.23    |
| Plasma IL-6 (pg/ml)                    | 18.92 (9.28, 38.79), N=71        | 33.18 (22.75, 81.44), N=20   | 0.009   |
| Plasma IL-8 (pg/ml)                    | 22.68 (12.11, 43.23), N=71       | 63.81 (44.03, 159.9), N=20   | <0.001  |
| Plasma IL-10 (pg/ml)                   | 33.66 (5.82, 88.09), N=71        | 94.3 (34.44, 163.39), N=20   | 0.03    |
| Plasma IL-12 (pg/ml)                   | 0.1 (0.07, 0.14), N=71           | 0.15 (0.07, 0.21), N=20      | 0.07    |
| Plasma IL-13 (pg/ml)                   | 0.44 (0.26, 1.04), N=71          | 0.55 (0.44, 1.77), N=20      | 0.02    |
| Plasma TNF (pg/ml)                     | 3.93 (2.85, 5.46), N=71          | 4.88 (3.89, 6.83), N=20      | 0.09    |

\*\*p-values obtained by the Kruskal-Wallis test

**Supplemental Table 3: Performance of AKI Progression Biomarkers**

| <b>Biomarker</b>                                                                                                                                  | <b>Unadjusted OR*<br/>(95%CI)</b> | <b><u>Biomarker</u><br/>AUC# (SE)</b> |
|---------------------------------------------------------------------------------------------------------------------------------------------------|-----------------------------------|---------------------------------------|
| <b><u>Traditional Biomarkers</u></b>                                                                                                              |                                   |                                       |
| % Serum Cr Rise                                                                                                                                   | 3.7 (1.55, 8.81)                  | 0.62 (0.06)                           |
| Urine Albuminuria                                                                                                                                 | 1.56 (0.99, 2.46)                 | 0.66 (0.07)                           |
| <b><u>Cystatin C</u></b>                                                                                                                          |                                   |                                       |
| Urine Cystatin C                                                                                                                                  | 1.74 (1.15, 2.64)                 | 0.64 (0.07)                           |
| Blood Cystatin C                                                                                                                                  | 1.46 (0.43, 4.93)                 | 0.56 (0.07)                           |
| <b><u>Kidney Injury Biomarkers</u></b>                                                                                                            |                                   |                                       |
| Urine IL-18                                                                                                                                       | 1.43 (1.09, 1.86)                 | 0.69 (0.06)                           |
| Urine NGAL                                                                                                                                        | 1.39 (1.08, 1.8)                  | 0.67 (0.08)                           |
| Urine KIM-1                                                                                                                                       | 1.17 (0.87, 1.57)                 | 0.57 (0.06)                           |
| Urine L-FABP                                                                                                                                      | 1.43 (1.14, 1.8)                  | 0.70 (0.06)                           |
| Plasma NGAL                                                                                                                                       | 1.25 (0.54, 2.9)                  | 0.51 (0.08)                           |
| <b><u>Inflammatory Biomarkers</u></b>                                                                                                             |                                   |                                       |
| Plasma IFN                                                                                                                                        | 1.28 (0.82, 2)                    | 0.52 (0.08)                           |
| Plasma IL-1                                                                                                                                       | 2.29 (0.83, 6.32)                 | 0.58 (0.05)                           |
| Plasma IL-2                                                                                                                                       | 1.61 (1.07, 2.43)                 | 0.67 (0.07)                           |
| Plasma IL-4                                                                                                                                       | 1.37 (0.85, 2.19)                 | 0.59 (0.07)                           |
| Plasma IL-6                                                                                                                                       | 1.63 (1.02, 2.6)                  | 0.69 (0.07)                           |
| Plasma IL-8                                                                                                                                       | 2.94 (1.66, 5.22)                 | 0.80 (0.06)                           |
| Plasma IL-10                                                                                                                                      | 1.38 (0.98, 1.96)                 | 0.66 (0.07)                           |
| Plasma IL-12                                                                                                                                      | 1.8 (0.89, 3.62)                  | 0.62 (0.08)                           |
| Plasma IL-13                                                                                                                                      | 2.07 (1.08, 3.96)                 | 0.67 (0.07)                           |
| Plasma TNF                                                                                                                                        | 1.95 (0.78, 4.9)                  | 0.63 (0.07)                           |
| *, odds ratio for log-continuous biomarkers. #, without optimism correction. AKI, acute kidney injury. OR, odds ratio. AUC, area under the curve. |                                   |                                       |

**Supplemental Table 4: Biomarkers to Predict Progression from Stage I AKI to Higher AKI Stages**

| <b>Biomarker</b>                                                                                                                                                      | <b>Unadjusted OR*<br/>(95%CL)</b> | <b><u>Biomarker</u><br/>unadjusted AUC#<br/>(SE)</b> |
|-----------------------------------------------------------------------------------------------------------------------------------------------------------------------|-----------------------------------|------------------------------------------------------|
| <b><u>Traditional Biomarkers</u></b>                                                                                                                                  |                                   |                                                      |
| <b>Serum Cr % Rise</b>                                                                                                                                                | 5.35 (0.85, 33.5)                 | 0.61 (0.07)                                          |
| <b>Urine Microalbumin</b>                                                                                                                                             | 1.82 (1.09, 3.05)                 | 0.70 (0.07)                                          |
| <b><u>Cystatin C</u></b>                                                                                                                                              |                                   |                                                      |
| <b>Urine Cystatin C</b>                                                                                                                                               | 1.71 (1.1, 2.66)                  | 0.61 (0.09)                                          |
| <b>Blood Cystatin C</b>                                                                                                                                               | 1.51 (0.37, 6.13)                 | 0.56 (0.08)                                          |
| <b><u>Kidney Injury Biomarkers</u></b>                                                                                                                                |                                   |                                                      |
| <b>Urine IL-18</b>                                                                                                                                                    | 1.54 (1.14, 2.07)                 | 0.74 (0.07)                                          |
| <b>Urine NGAL</b>                                                                                                                                                     | 1.52 (1.15, 2.01)                 | 0.73 (0.08)                                          |
| <b>Urine KIM-1</b>                                                                                                                                                    | 1.15 (0.8, 1.65)                  | 0.57 (0.07)                                          |
| <b>Urine L-FABP</b>                                                                                                                                                   | 1.58 (1.18, 2.1)                  | 0.73 (0.07)                                          |
| <b>Blood NGAL</b>                                                                                                                                                     | 1.5 (0.6, 3.75)                   | 0.53 (0.09)                                          |
| <b><u>Inflammatory Biomarkers</u></b>                                                                                                                                 |                                   |                                                      |
| <b>Blood IFN</b>                                                                                                                                                      | 1.19 (0.74, 1.94)                 | 0.48 (0.09)                                          |
| <b>Blood IL-1</b>                                                                                                                                                     | 2.06 (0.72, 5.86)                 | 0.57 (0.06)                                          |
| <b>Blood IL-2</b>                                                                                                                                                     | 1.91 (1.18, 3.09)                 | 0.73 (0.06)                                          |
| <b>Blood IL-4</b>                                                                                                                                                     | 1.48 (0.86, 2.52)                 | 0.60 (0.08)                                          |
| <b>Blood IL-6</b>                                                                                                                                                     | 2.18 (1.19, 4)                    | 0.70 (0.07)                                          |
| <b>Blood IL-8</b>                                                                                                                                                     | 3.42 (1.74, 6.7)                  | 0.83 (0.06)                                          |
| <b>Blood IL-10</b>                                                                                                                                                    | 1.44 (0.96, 2.16)                 | 0.65 (0.07)                                          |
| <b>Blood IL-12</b>                                                                                                                                                    | 1.83 (0.84, 4)                    | 0.59 (0.09)                                          |
| <b>Blood IL-13</b>                                                                                                                                                    | 1.84 (0.9, 3.77)                  | 0.64 (0.08)                                          |
| <b>Blood TNF</b>                                                                                                                                                      | 1.62 (0.61, 4.34)                 | 0.60 (0.08)                                          |
| *, odds ratio for log-continuous biomarkers. #, without optimism correction. AKI, acute kidney injury. AUC, area under the curve. OR, odds ratio, SE, standard error. |                                   |                                                      |

**Supplemental Table 5: Biomarkers to Predict Progression from Stage I and II AKI to Higher AKI Stages**

| <b>Biomarker</b>                                                                                                                                                      | <b>Unadjusted OR*<br/>(95%CL)</b> | <b>Biomarker<br/>unadjusted AUC#<br/>(SE)</b> |
|-----------------------------------------------------------------------------------------------------------------------------------------------------------------------|-----------------------------------|-----------------------------------------------|
| <b><u>Traditional Biomarkers</u></b>                                                                                                                                  |                                   |                                               |
| <b>Serum Cr % Rise</b>                                                                                                                                                | 1.71 (0.54, 5.38)                 | 0.56 (0.06)                                   |
| <b>Urine Microalbumin</b>                                                                                                                                             | 1.62 (1.01, 2.6)                  | 0.67 (0.07)                                   |
| <b><u>Cystatin C</u></b>                                                                                                                                              |                                   |                                               |
| <b>Urine Cystatin C</b>                                                                                                                                               | 1.78 (1.15, 2.74)                 | 0.63 (0.08)                                   |
| <b>Blood Cystatin C</b>                                                                                                                                               | 1 (0.28, 3.55)                    | 0.49 (0.08)                                   |
| <b><u>Kidney Injury Biomarkers</u></b>                                                                                                                                |                                   |                                               |
| <b>Urine IL-18</b>                                                                                                                                                    | 1.52 (1.14, 2.03)                 | 0.73 (0.06)                                   |
| <b>Urine NGAL</b>                                                                                                                                                     | 1.47 (1.13, 1.92)                 | 0.71 (0.08)                                   |
| <b>Urine KIM-1</b>                                                                                                                                                    | 1.09 (0.78, 1.51)                 | 0.54 (0.06)                                   |
| <b>Urine L-FABP</b>                                                                                                                                                   | 1.51 (1.16, 1.97)                 | 0.71 (0.06)                                   |
| <b>Blood NGAL</b>                                                                                                                                                     | 1.22 (0.51, 2.88)                 | 0.5 (0.09)                                    |
| <b><u>Inflammatory Biomarkers</u></b>                                                                                                                                 |                                   |                                               |
| <b>Blood IFN</b>                                                                                                                                                      | 1.26 (0.79, 2.02)                 | 0.5 (0.08)                                    |
| <b>Blood IL-1</b>                                                                                                                                                     | 2.24 (0.79, 6.34)                 | 0.57 (0.06)                                   |
| <b>Blood IL-2</b>                                                                                                                                                     | 1.74 (1.12, 2.71)                 | 0.7 (0.07)                                    |
| <b>Blood IL-4</b>                                                                                                                                                     | 1.38 (0.84, 2.27)                 | 0.59 (0.08)                                   |
| <b>Blood IL-6</b>                                                                                                                                                     | 1.54 (0.96, 2.47)                 | 0.67 (0.08)                                   |
| <b>Blood IL-8</b>                                                                                                                                                     | 2.98 (1.62, 5.48)                 | 0.79 (0.06)                                   |
| <b>Blood IL-10</b>                                                                                                                                                    | 1.24 (0.88, 1.75)                 | 0.61 (0.08)                                   |
| <b>Blood IL-12</b>                                                                                                                                                    | 1.75 (0.85, 3.61)                 | 0.6 (0.09)                                    |
| <b>Blood IL-13</b>                                                                                                                                                    | 1.84 (0.92, 3.66)                 | 0.64 (0.07)                                   |
| <b>Blood TNF</b>                                                                                                                                                      | 1.85 (0.7, 4.9)                   | 0.62 (0.07)                                   |
| *, odds ratio for log-continuous biomarkers. #, without optimism correction. AKI, acute kidney injury. AUC, area under the curve. OR, odds ratio, SE, standard error. |                                   |                                               |

Supplemental Figure 1a: Biomarker Levels by Sample Storage Time

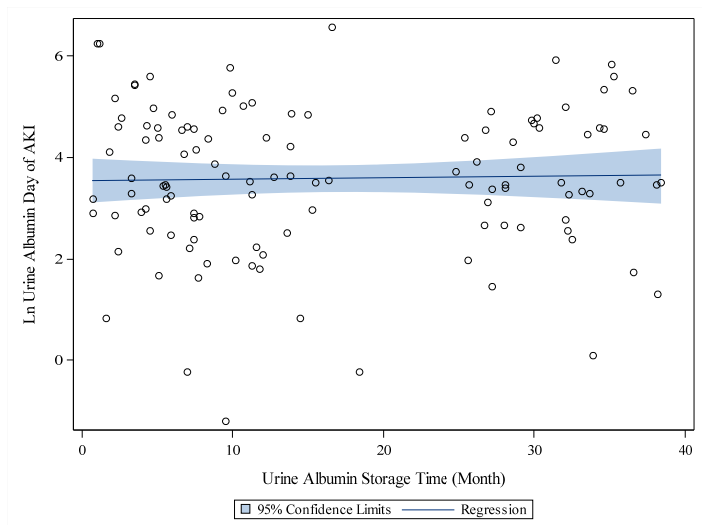

Supplemental Figure 1b Biomarker Levels by Sample Storage Time

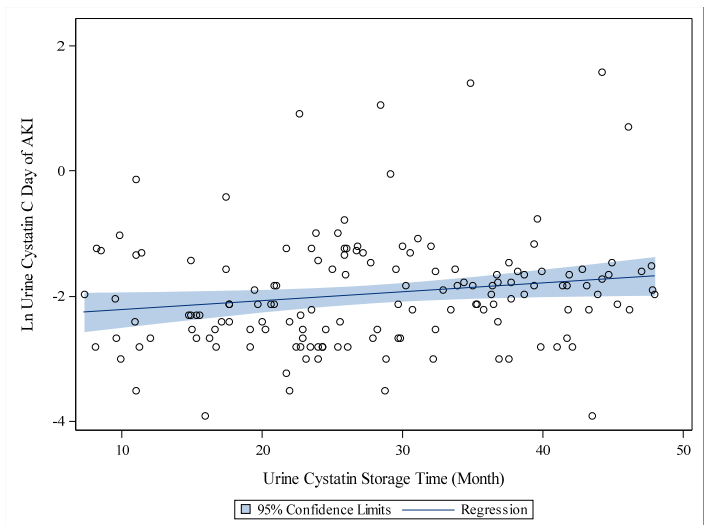

Supplemental Figure 1c: Biomarker Levels by Sample Storage Time

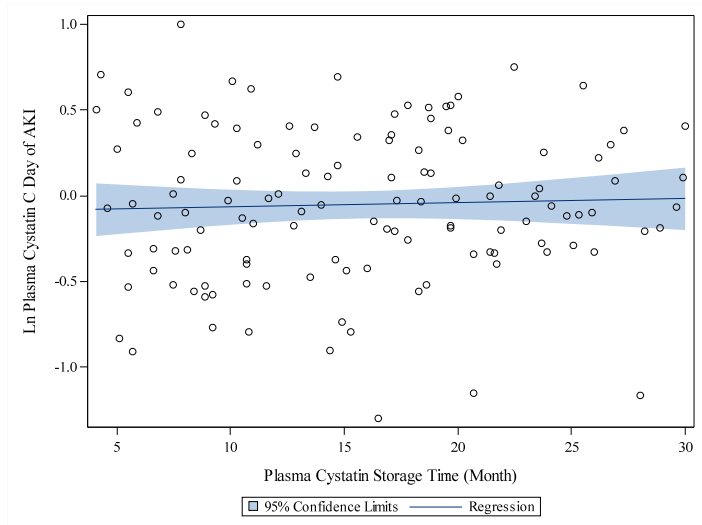

Supplemental Figure 1d Biomarker Levels by Sample Storage Time

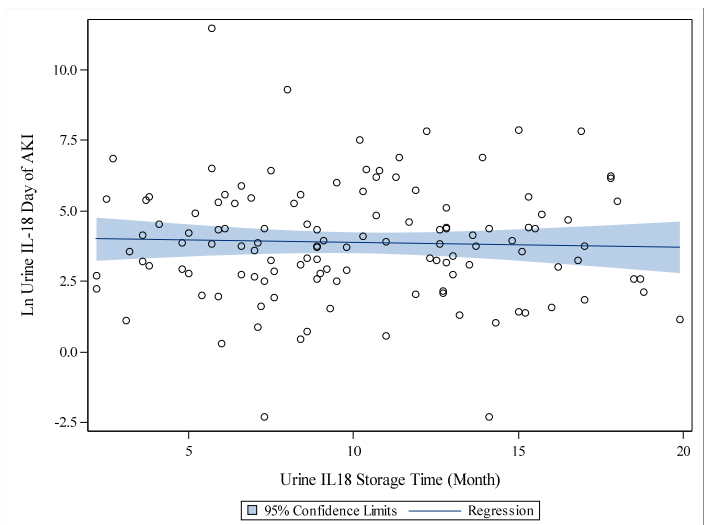

Supplemental Figure 1e: Biomarker Levels by Sample Storage Time

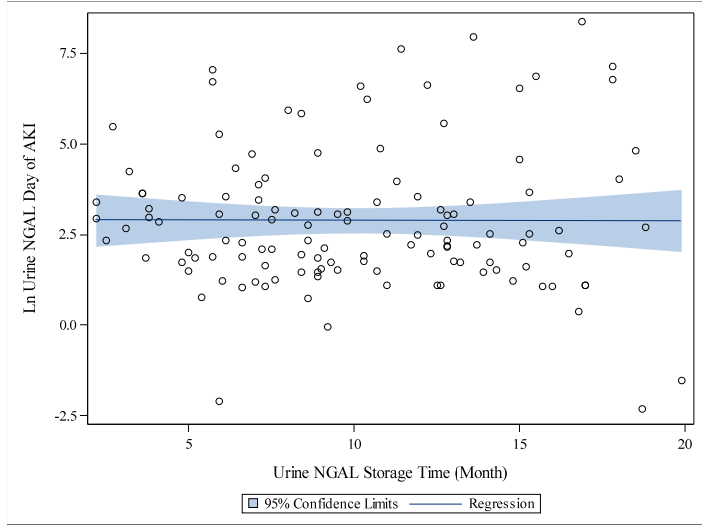

Supplemental Figure 1f Biomarker Levels by Sample Storage Time

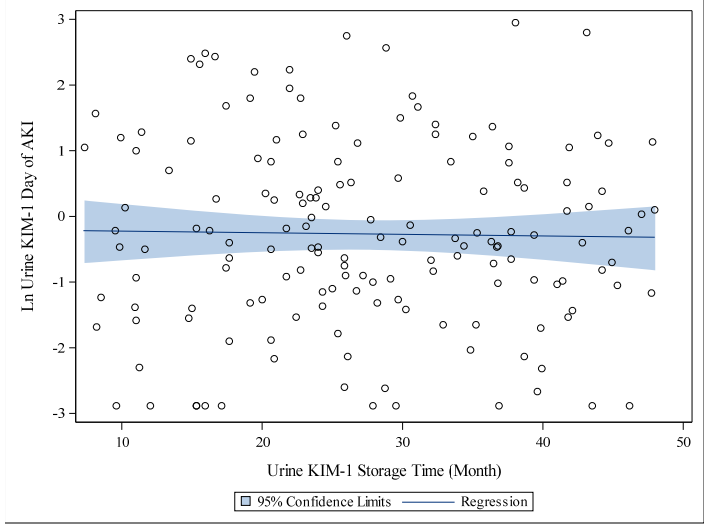

Supplemental Figure 1g: Biomarker Levels by Sample Storage Time

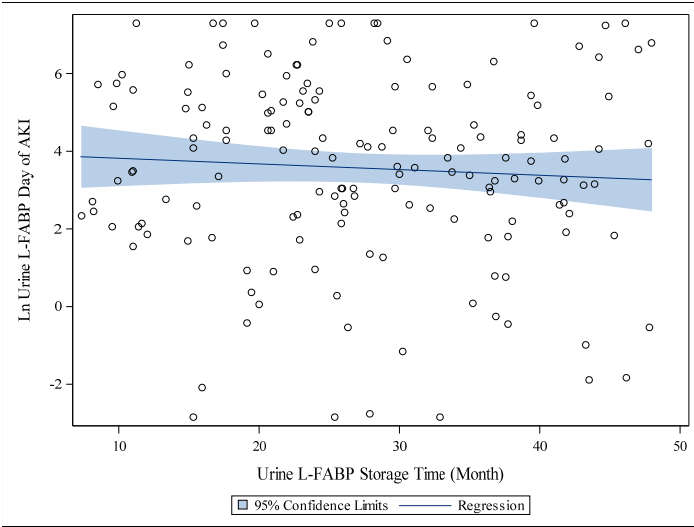

Supplemental Figure 1h Biomarker Levels by Sample Storage Time

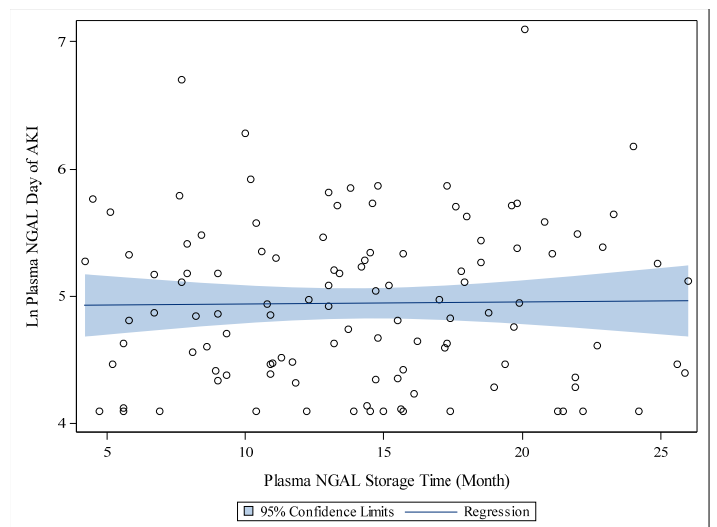

Supplemental Figure 1i: Biomarker Levels by Sample Storage Time

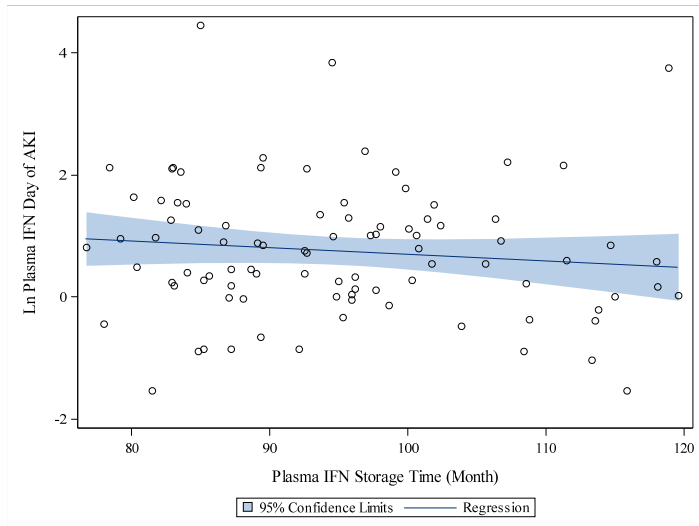

Supplemental Figure 1j Biomarker Levels by Sample Storage Time

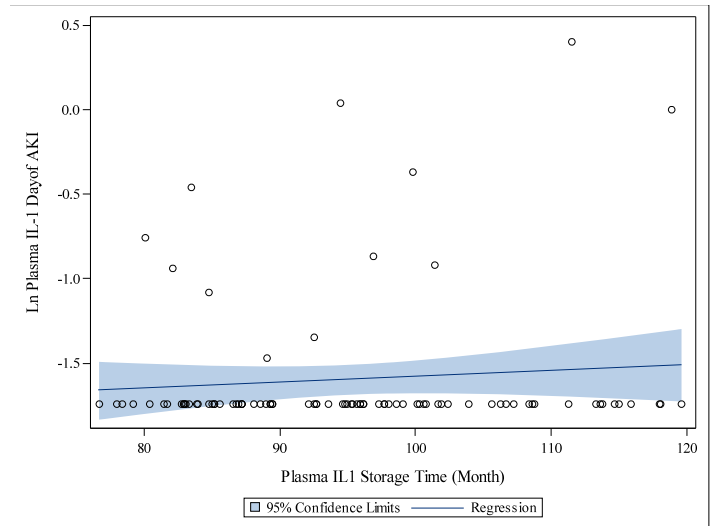

Supplemental Figure 1k: Biomarker Levels by Sample Storage Time

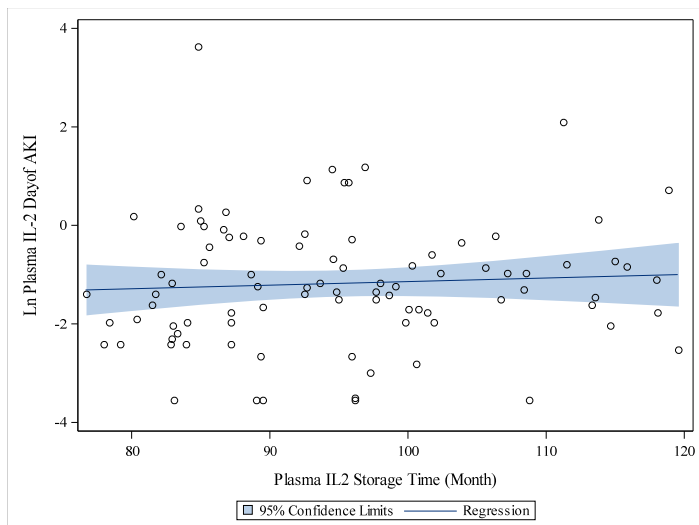

Supplemental Figure 1l Biomarker Levels by Sample Storage Time

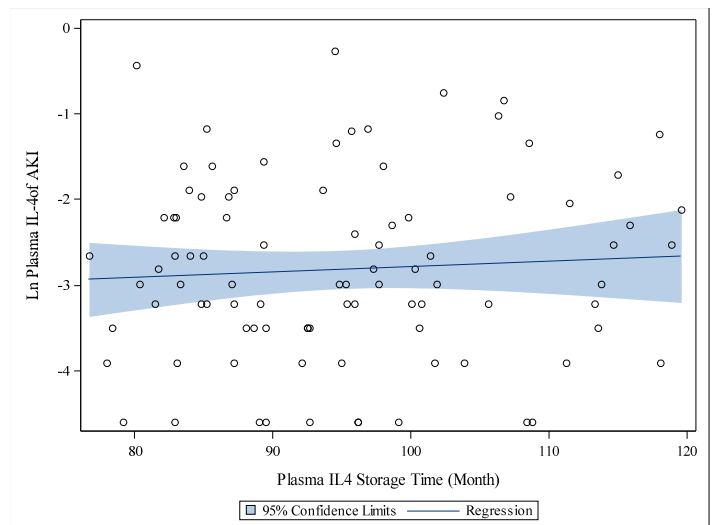



Supplemental Figure 1m: Biomarker Levels by Sample Storage Time

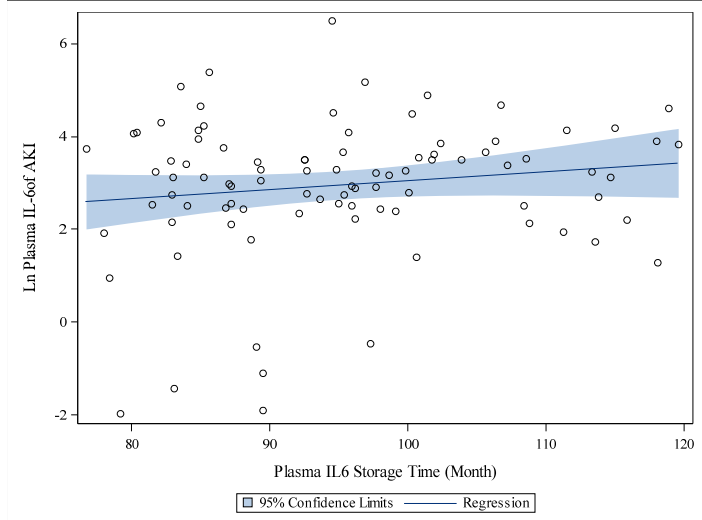

Supplemental Figure 1n Biomarker Levels by Sample Storage Time

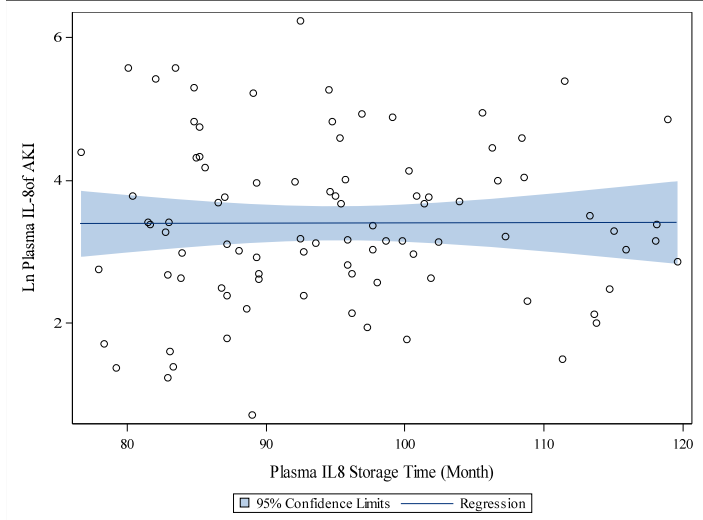

Supplemental Figure 1o: Biomarker Levels by Sample Storage Time

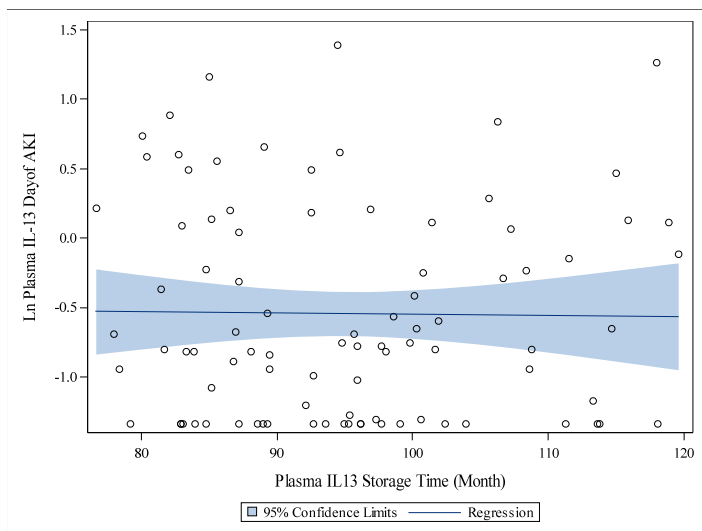

Supplemental Figure 1p Biomarker Levels by Sample Storage Time

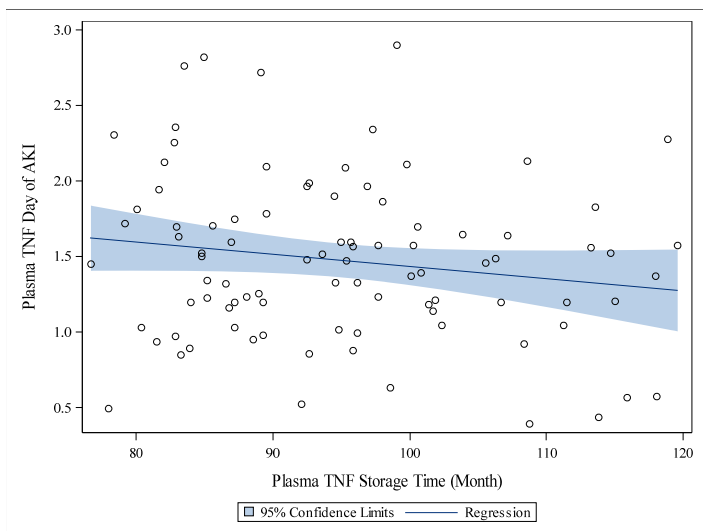

Supplemental Figure 1q: Biomarker Levels by Sample Storage Time

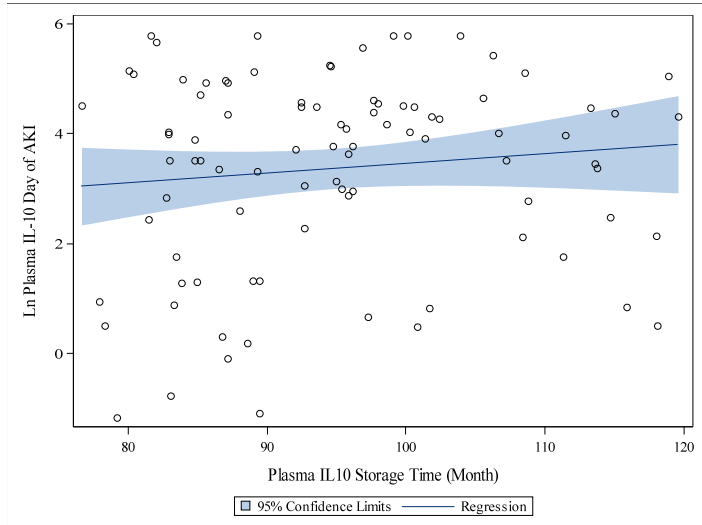

Supplemental Figure 1r Biomarker Levels by Sample Storage Time

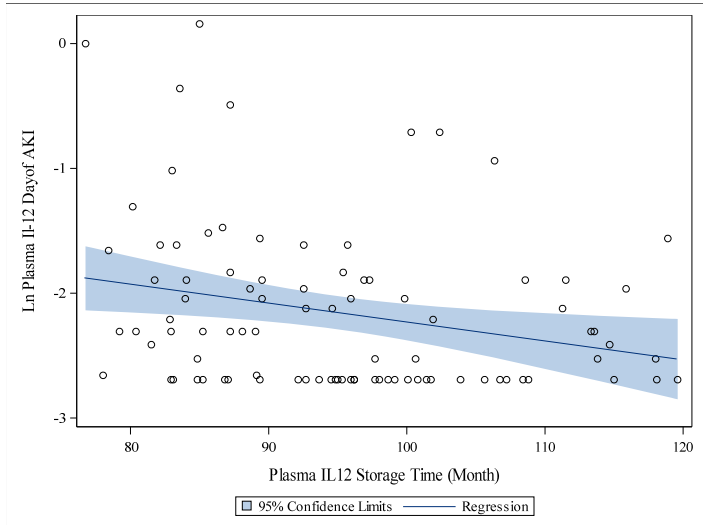

Supplement: ASN.2017090989SupplementaryData1.pdf [file ASN.2017090989SupplementaryData1.pdf]
